# Supplementary material for: Study on the efficiency of some amine derivatives as corrosion and scale inhibitors in cooling water systems
Source: Royal Society of Chemistry journal article supplement (doi:10.1039/c5ra11082c), 2015-01-01
Supplement: c5ra11082c1.pdf [file c5ra11082c1.pdf]

**Table (4)** Data obtained from potentiodynamic polarization measurements of carbon steel in sea water solution in the absence and presence of various concentrations of compounds I, II, and III at 298 K.

| Inhibitor | Conc., ppm | $-E_{\text{corr}}$ , mV vs. SCE | $I_{\text{corr}}$ , $\mu\text{A}/\text{cm}^2$ |       |       |         |         | $\beta_a$ , mV dec <sup>-1</sup> | $\beta_c$ , mV dec <sup>-1</sup> | IE%   |       |       |         |         |
|-----------|------------|---------------------------------|-----------------------------------------------|-------|-------|---------|---------|----------------------------------|----------------------------------|-------|-------|-------|---------|---------|
|           |            |                                 | Run 1                                         | Run 2 | Run 3 | STD DEV | Average |                                  |                                  | Run 1 | Run 2 | Run 3 | STD DEV | Average |
| Blank     | 0          | 760                             | 24.04                                         | 26.62 | 26.20 | 1.39    | 25.62   | 119.1                            | 301.4                            | -     | -     | -     | -       | -       |
| (I)       | 50         | 776.1                           | 13.51                                         | 14.09 | 14.81 | 0.65    | 14.14   | 115.1                            | 229.6                            | 43.80 | 47.08 | 43.47 | 1.99    | 44.78   |
|           | 100        | 738                             | 12.90                                         | 12.35 | 11.60 | 0.65    | 12.28   | 112.3                            | 149.7                            | 46.34 | 53.61 | 55.73 | 4.92    | 51.89   |
|           | 150        | 807.6                           | 10.25                                         | 11.50 | 11.16 | 0.65    | 10.97   | 133.2                            | 206.8                            | 57.36 | 56.79 | 57.40 | 0.34    | 57.18   |
|           | 200        | 737.1                           | 9.56                                          | 10.72 | 11.25 | 0.86    | 10.51   | 129.6                            | 162.8                            | 60.22 | 59.73 | 57.08 | 1.69    | 59.01   |
|           | 250        | 734.4                           | 8.50                                          | 9.95  | 9.00  | 0.74    | 9.15    | 125.2                            | 138.4                            | 64.64 | 62.63 | 65.65 | 1.54    | 64.31   |
|           | 300        | 699.8                           | 5.48                                          | 6.89  | 6.96  | 0.83    | 6.44    | 127.7                            | 157.2                            | 77.20 | 74.12 | 73.45 | 2.00    | 74.93   |
| (II)      | 50         | 788.6                           | 12.05                                         | 14.30 | 12.70 | 1.16    | 13.02   | 125.2                            | 211.7                            | 49.88 | 46.29 | 51.53 | 2.68    | 49.23   |
|           | 100        | 735.7                           | 11.30                                         | 12.10 | 12.48 | 0.60    | 11.96   | 120.9                            | 190.8                            | 53.00 | 54.55 | 52.37 | 1.13    | 53.30   |
|           | 150        | 796.4                           | 10.20                                         | 10.22 | 11.85 | 0.95    | 10.76   | 135.4                            | 216.7                            | 57.57 | 61.61 | 54.77 | 3.44    | 57.98   |
|           | 200        | 714.1                           | 8.60                                          | 9.20  | 9.80  | 0.60    | 9.20    | 135.2                            | 195.3                            | 64.23 | 65.44 | 62.60 | 1.43    | 64.09   |
|           | 250        | 695.5                           | 7.51                                          | 7.76  | 8.70  | 0.63    | 7.99    | 130.7                            | 188.1                            | 68.76 | 70.85 | 66.79 | 2.03    | 68.80   |
|           | 300        | 651.7                           | 5.28                                          | 6.66  | 5.11  | 0.85    | 5.68    | 131.6                            | 144.5                            | 78.03 | 74.98 | 80.49 | 2.76    | 77.83   |
| (III)     | 50         | 689.1                           | 8.29                                          | 9.00  | 9.73  | 0.72    | 9.01    | 247.8                            | 168.7                            | 65.52 | 66.20 | 62.86 | 1.76    | 64.86   |
|           | 100        | 682.9                           | 7.62                                          | 7.10  | 8.05  | 0.48    | 7.59    | 206.5                            | 173.2                            | 68.30 | 73.33 | 69.27 | 2.67    | 70.30   |
|           | 150        | 682.1                           | 6.10                                          | 6.90  | 7.10  | 0.53    | 6.70    | 199.4                            | 171.3                            | 74.63 | 74.08 | 72.90 | 0.88    | 73.87   |
|           | 200        | 679.9                           | 4.80                                          | 5.78  | 4.54  | 0.66    | 5.04    | 187.5                            | 171.2                            | 80.03 | 78.29 | 82.69 | 2.21    | 80.34   |
|           | 250        | 672.6                           | 3.40                                          | 3.65  | 4.50  | 0.58    | 3.85    | 195.1                            | 160.7                            | 85.86 | 86.29 | 82.82 | 1.89    | 84.99   |
|           | 300        | 610.8                           | 1.80                                          | 2.16  | 2.10  | 0.19    | 2.02    | 192.6                            | 166.1                            | 92.51 | 91.88 | 91.98 | 0.34    | 92.13   |

**Table (5)** Data obtained from electrochemical impedance spectroscopy (EIS) measurements of carbon steel in sea water solution in the absence and presence of various concentrations of compounds I, II and III.

| Inhibitor | Conc., ppm | Coefficient | R <sub>s</sub> , (Ω.cm <sup>2</sup> ) | C <sub>s</sub> (μF.cm <sup>2</sup> ) | R <sub>t</sub> (Ω.cm <sup>2</sup> ) |        |        |         |         | Cdl (μF.cm <sup>2</sup> ) | IE%   |       |       |         |         |
|-----------|------------|-------------|---------------------------------------|--------------------------------------|-------------------------------------|--------|--------|---------|---------|---------------------------|-------|-------|-------|---------|---------|
|           |            |             |                                       |                                      | Run 1                               | Run 2  | Run 3  | STD DEV | Average |                           | Run 1 | Run 2 | Run 3 | STD DEV | Average |
| Blank     | 0          | 0.99        | -                                     | -                                    | 354.6                               | 358.1  | 361.7  | 3.5     | 358.13  | 1302                      | -     |       |       |         |         |
| (I)       | 50         | 0.99        | 230                                   | 48.1                                 | 634.0                               | 650.0  | 642.0  | 8.0     | 642.00  | 1217                      | 44.07 | 44.91 | 43.66 | 0.63    | 44.21   |
|           | 100        | 0.99        | 270                                   | 43.4                                 | 750.0                               | 754.0  | 735.0  | 10.0    | 746.33  | 1104                      | 52.72 | 52.51 | 50.79 | 1.06    | 52.01   |
|           | 150        | 0.99        | 320                                   | 37.2                                 | 798.0                               | 806.0  | 790.0  | 8.0     | 798.00  | 989.3                     | 55.56 | 55.57 | 54.22 | 0.78    | 55.12   |
|           | 200        | 0.99        | 350                                   | 32.5                                 | 871.0                               | 875.0  | 865.0  | 5.0     | 870.33  | 930.1                     | 59.29 | 59.07 | 58.19 | 0.58    | 58.85   |
|           | 250        | 0.99        | 380                                   | 29.3                                 | 1011.0                              | 991.0  | 1001.0 | 10.0    | 1001.00 | 902.5                     | 64.93 | 63.86 | 63.87 | 0.61    | 64.22   |
|           | 300        | 0.99        | 390                                   | 28.7                                 | 1420.0                              | 1385.0 | 1398.0 | 17.7    | 1401.00 | 887.4                     | 75.03 | 74.14 | 74.13 | 0.51    | 74.43   |
| (II)      | 50         | 0.99        | 250                                   | 46.2                                 | 706.0                               | 690.0  | 713.0  | 11.8    | 703.00  | 1159                      | 49.77 | 48.10 | 49.27 | 0.86    | 49.05   |
|           | 100        | 0.99        | 290                                   | 42.4                                 | 764.0                               | 748.7  | 771.6  | 11.7    | 761.45  | 1090                      | 53.59 | 52.17 | 53.13 | 0.72    | 52.96   |
|           | 150        | 0.99        | 350                                   | 36.7                                 | 829.6                               | 839.0  | 846.4  | 8.4     | 838.33  | 970.6                     | 57.26 | 57.32 | 57.27 | 0.03    | 57.28   |
|           | 200        | 0.99        | 370                                   | 31.1                                 | 996.0                               | 999.0  | 993.0  | 3.0     | 996.00  | 911.8                     | 64.40 | 64.15 | 63.58 | 0.42    | 64.04   |
|           | 250        | 0.99        | 410                                   | 28.8                                 | 1129.0                              | 1134.0 | 1143.0 | 7.1     | 1135.33 | 873.1                     | 68.59 | 68.42 | 68.36 | 0.12    | 68.46   |
|           | 300        | 0.99        | 420                                   | 27.6                                 | 1585.0                              | 1576.0 | 1615.0 | 20.4    | 1592.00 | 855.7                     | 77.63 | 77.28 | 77.60 | 0.20    | 77.50   |
| (III)     | 50         | 0.99        | 280                                   | 43.2                                 | 1016.0                              | 1004.9 | 1025.2 | 10.2    | 1015.33 | 1004                      | 65.10 | 64.36 | 64.72 | 0.37    | 64.73   |
|           | 100        | 0.99        | 330                                   | 40.5                                 | 1203.0                              | 1215.0 | 1191.0 | 12.0    | 1203.00 | 978.1                     | 70.52 | 70.53 | 69.63 | 0.52    | 70.23   |
|           | 150        | 0.99        | 390                                   | 35.2                                 | 1366.0                              | 1360.0 | 1342.4 | 12.2    | 1356.15 | 914.4                     | 74.04 | 73.67 | 73.06 | 0.50    | 73.59   |
|           | 200        | 0.99        | 420                                   | 29.1                                 | 1805.0                              | 1801.0 | 1792.0 | 6.7     | 1799.33 | 877.5                     | 80.35 | 80.12 | 79.82 | 0.27    | 80.10   |
|           | 250        | 0.99        | 430                                   | 27.9                                 | 2367.0                              | 2355.0 | 2371.0 | 8.3     | 2364.33 | 822.3                     | 85.02 | 84.79 | 84.75 | 0.15    | 84.85   |
|           | 300        | 0.99        | 440                                   | 26.4                                 | 3978.0                              | 3996.0 | 3988.0 | 9.0     | 3987.33 | 786.9                     | 91.09 | 91.04 | 90.93 | 0.08    | 91.02   |

**Table (6)** Efficiency of the selected amine derivatives (I, II and III) as calcium sulfate scale inhibitors at various concentrations as calculated from ASTM G 3-89 Re-approved 1994

| Conc.,<br>ppm | Percentage Inhibition Efficiency (IE%) of<br>Inhibitor I |        |        |            |         | Percentage Inhibition Efficiency (IE%) of<br>Inhibitor II |        |        |            |         | Percentage Inhibition Efficiency (IE%) of<br>Inhibitor III |        |        |            |         |
|---------------|----------------------------------------------------------|--------|--------|------------|---------|-----------------------------------------------------------|--------|--------|------------|---------|------------------------------------------------------------|--------|--------|------------|---------|
|               | Run 1                                                    | Run 2  | Run 3  | STD<br>DEV | Average | Run 1                                                     | Run 2  | Run 3  | STD<br>DEV | Average | Run 1                                                      | Run 2  | Run 3  | STD<br>DEV | Average |
| 0             | -                                                        | -      | -      | -          | -       | -                                                         | -      | -      | -          | -       | -                                                          | -      | -      | -          | -       |
| 25            | 30.393                                                   | 31.35  | 30.393 | 0.55       | 30.71   | 38.5                                                      | 38.1   | 38.7   | 0.31       | 38.43   | 52.5                                                       | 51.48  | 52.1   | 0.51       | 52.03   |
| 50            | 45.5                                                     | 46     | 44.45  | 0.79       | 45.32   | 52.015                                                    | 51.5   | 50.985 | 0.52       | 51.50   | 62.132                                                     | 64.034 | 64.034 | 1.10       | 63.40   |
| 75            | 55.9                                                     | 57.2   | 55.8   | 0.78       | 56.30   | 63.226                                                    | 61.348 | 63.226 | 1.08       | 62.60   | 75.548                                                     | 75.548 | 73.304 | 1.30       | 74.80   |
| 100           | 63.261                                                   | 65.2   | 63.261 | 1.12       | 63.91   | 68.6                                                      | 69.5   | 69.9   | 0.67       | 69.33   | 79.2                                                       | 78.9   | 79.8   | 0.46       | 79.30   |
| 125           | 65.751                                                   | 63.798 | 65.751 | 1.13       | 65.10   | 75.7                                                      | 75.1   | 74.8   | 0.46       | 75.20   | 85.6                                                       | 87.1   | 87.4   | 0.96       | 86.70   |

## Polarization curves for compounds I and II

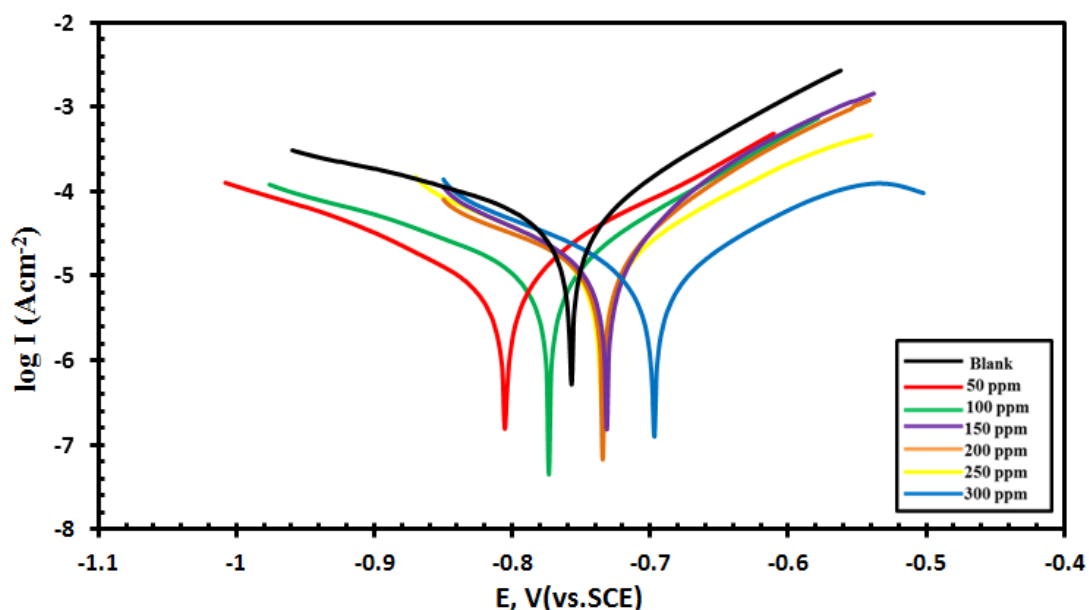

Figure (I): Potentiodynamic polarization curves ( $E - \log I$  relationship) of carbon steel in sea water in the absence and presence of different concentrations of compound I.

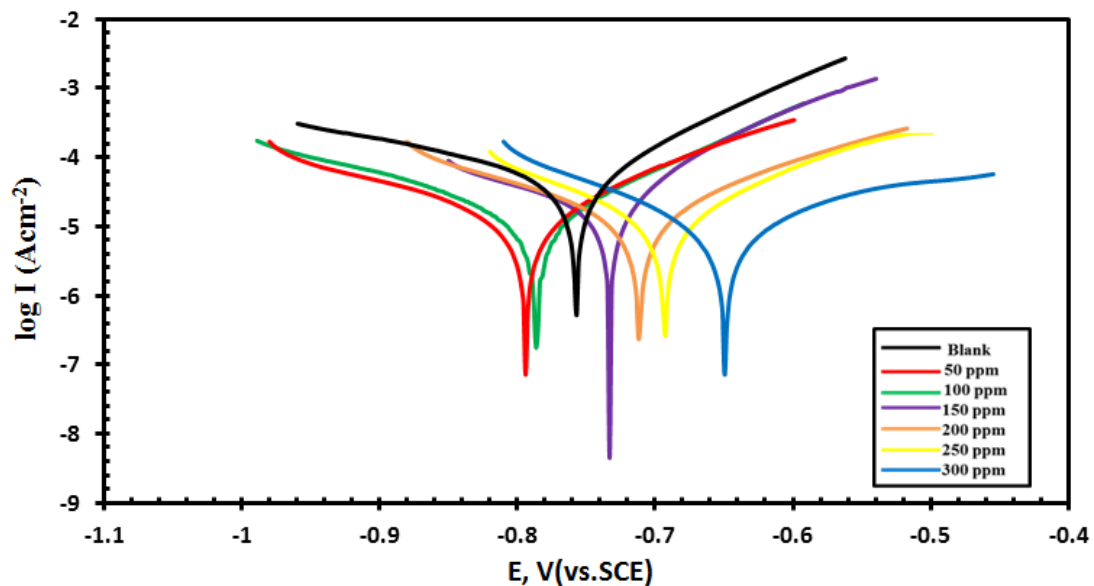

Figure (II): Potentiodynamic polarization curves ( $E - \log I$  relationship) of carbon steel in sea water in the absence and presence of different concentrations of compound II.

## Nyquist plots for compounds I and II

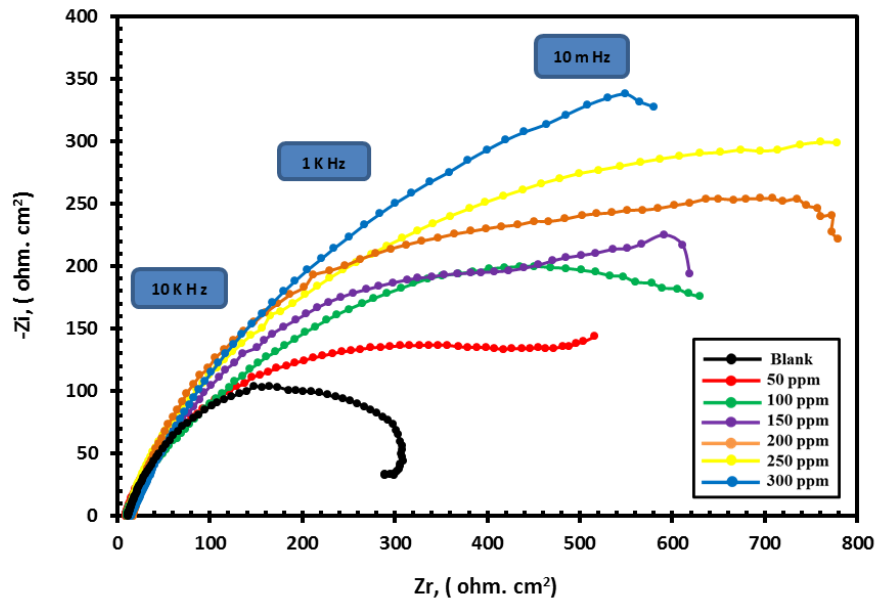

Figure (III). Nyquist plots for carbon steel in sea water in the absence and presence of different concentrations of compound I.

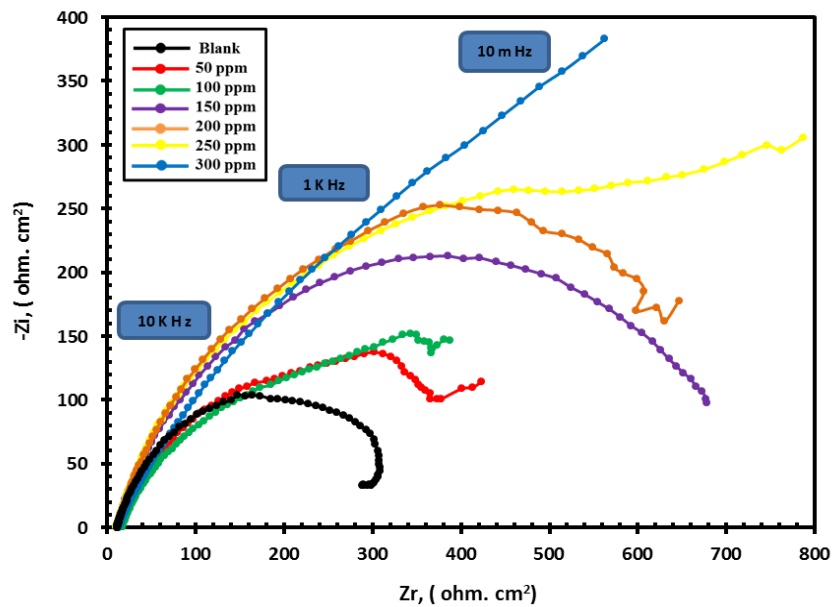

Figure (IV). Nyquist plots for carbon steel in sea water in the absence and presence of different concentrations of compound II.

## Bode plots for compounds I and II

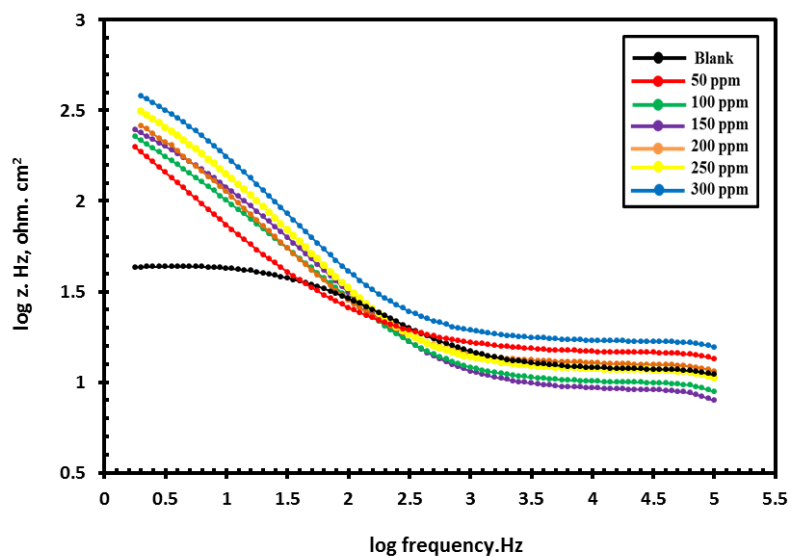

(a)

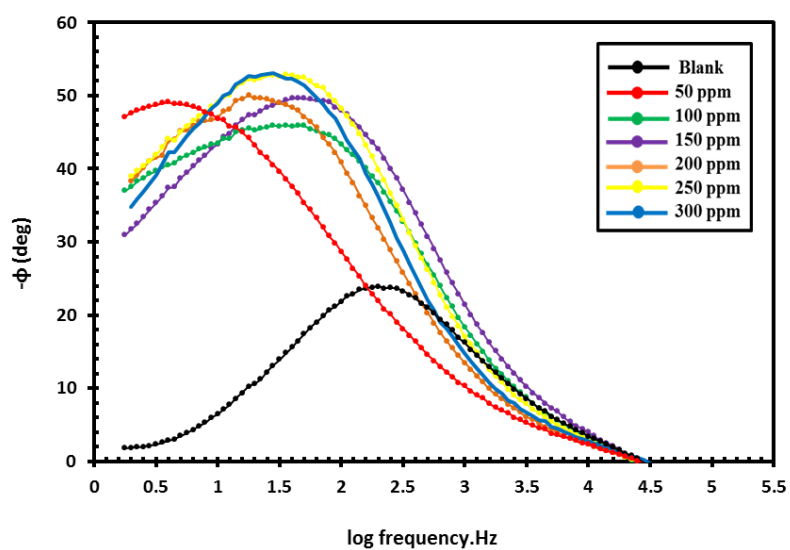

(b)

Figure (V). (a) Log frequency vs log Z (b) Log frequency vs Phase angle  
Bode plots for carbon steel in sea water in the absence and presence of  
different concentrations of compound I.

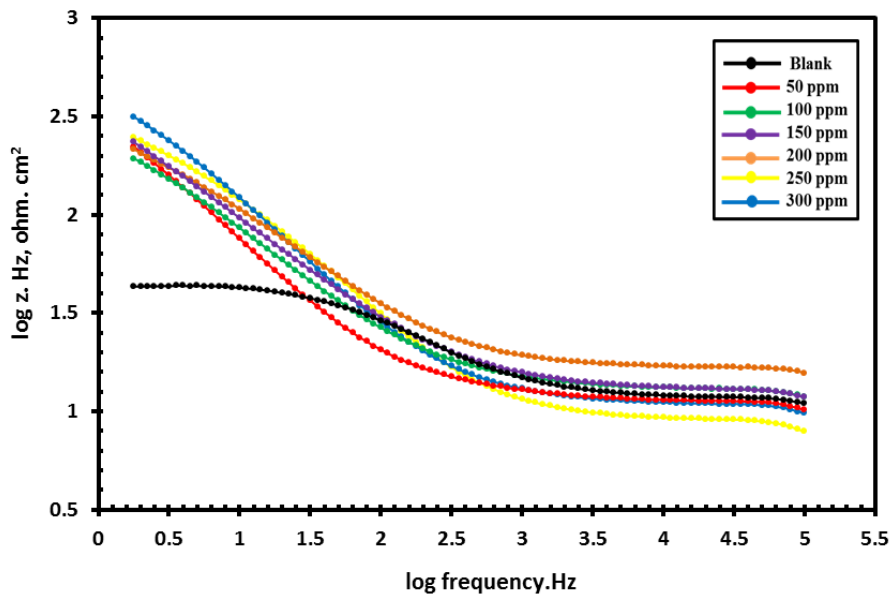

(a)

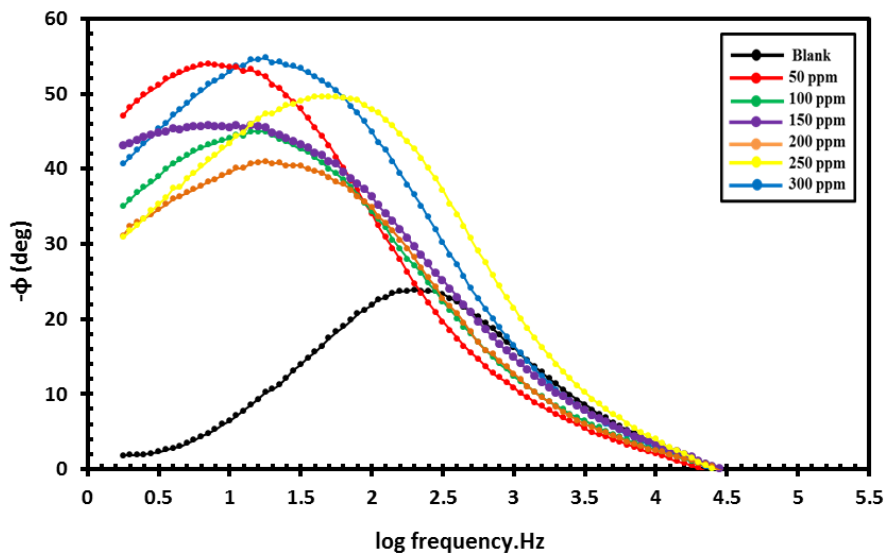

(b)

Figure (VI). (a) Log frequency vs log Z (b) Log frequency vs Phase angle Bode plots for carbon steel in sea water in the absence and presence of different concentrations of compound II.

# Inhibition mechanism of compounds I and II

## Corrosion inhibition mechanism

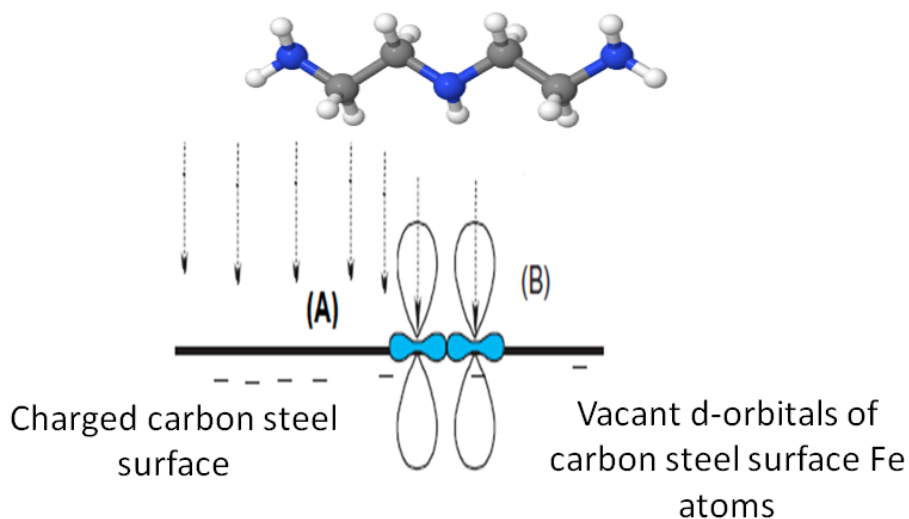

Figure (VII): Interaction between diethylenetriamine and carbon steel surface through chemical adsorption process

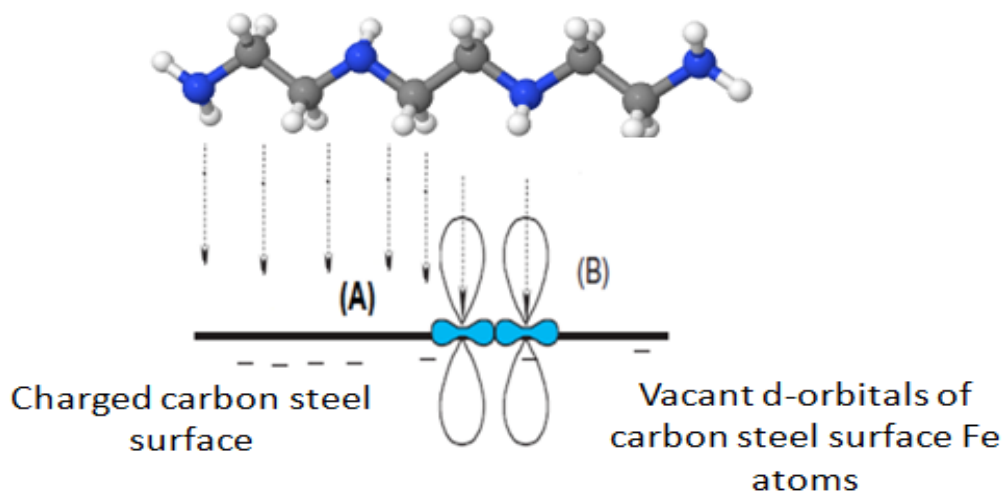

Figure (VIII): Interaction between triethylenetetramine and carbon steel surface through chemical adsorption process



## SEM and EDX of compound II

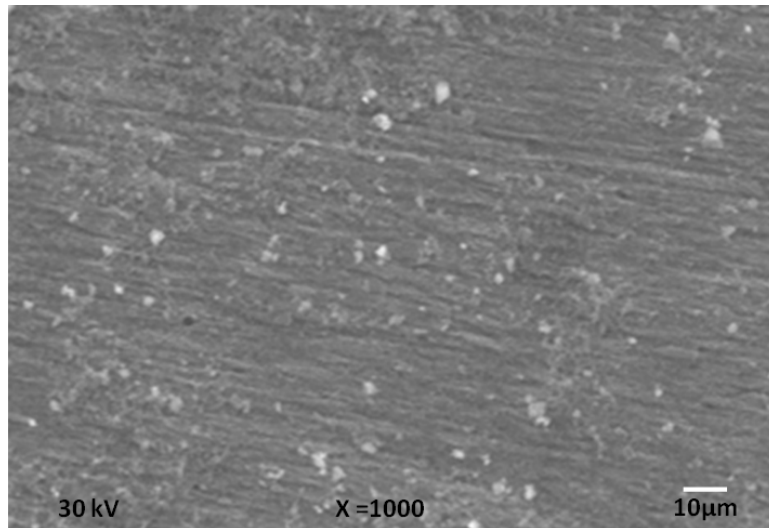

Figure (IX). SEM of the carbon steel surface: after immersion in the sea water in the presence of 300 ppm of compound II.

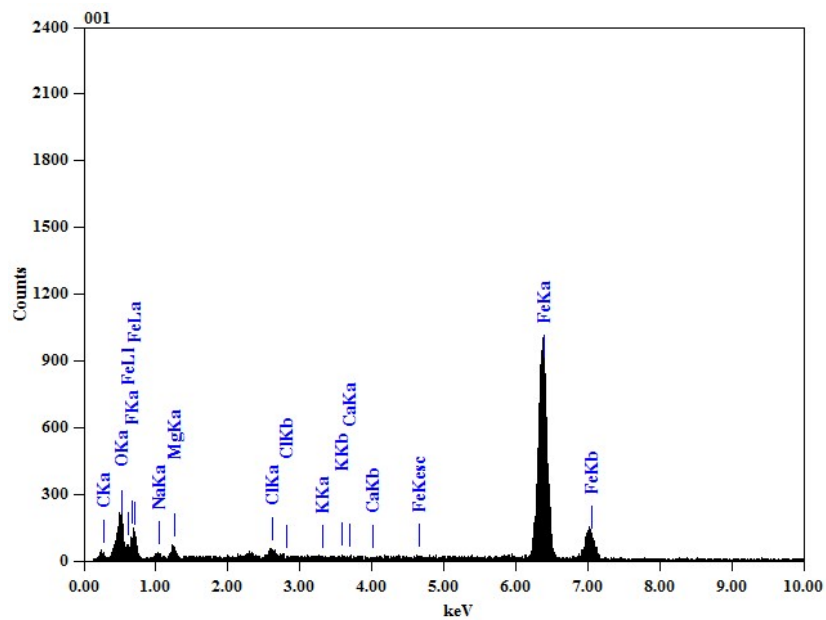

Figure (X). EDX of the carbon steel surface: after immersion in the sea water in the presence of 300 ppm of compound II.
